# Supplementary material
Source: MDPI journal article supplement (https://www.mdpi.com/2227-9717/11/6/1587)
Supplement: s1 [file s1]

# Water-assisted catalytic VACNT growth optimization for speed and height

Karlheinz Strobl<sup>1</sup>, Fahd Rajab<sup>2,\*</sup>

<sup>1</sup> CVD Equipment Corporation, 355 S. Technology Drive Central Islip, NY 11722; ks@eele.com

<sup>2</sup> Chemical Engineering Department, Najran University, Najran 11001, KSA;  
fmrajab@nu.edu.sa

\* Correspondence: fmrajab@nu.edu.sa; Tel.: (966175428942, FR)

## Supporting Information

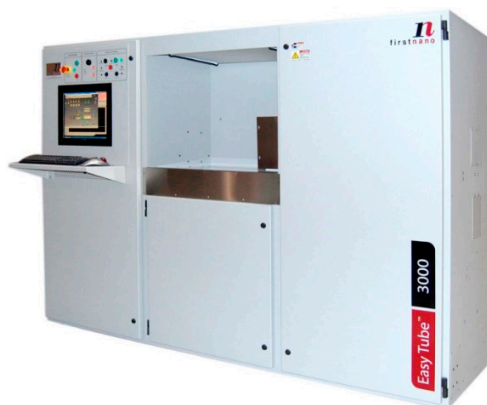

**SI Figure 1:** Fully automated medium size FirstNano® EasyTube® 3000 VACNT and thermal oxide growth system with a 5" diameter and 54 cm long horizontal quartz process tube with a 20" long heating zone having a 4" load and end zone and a 6" center zone length.

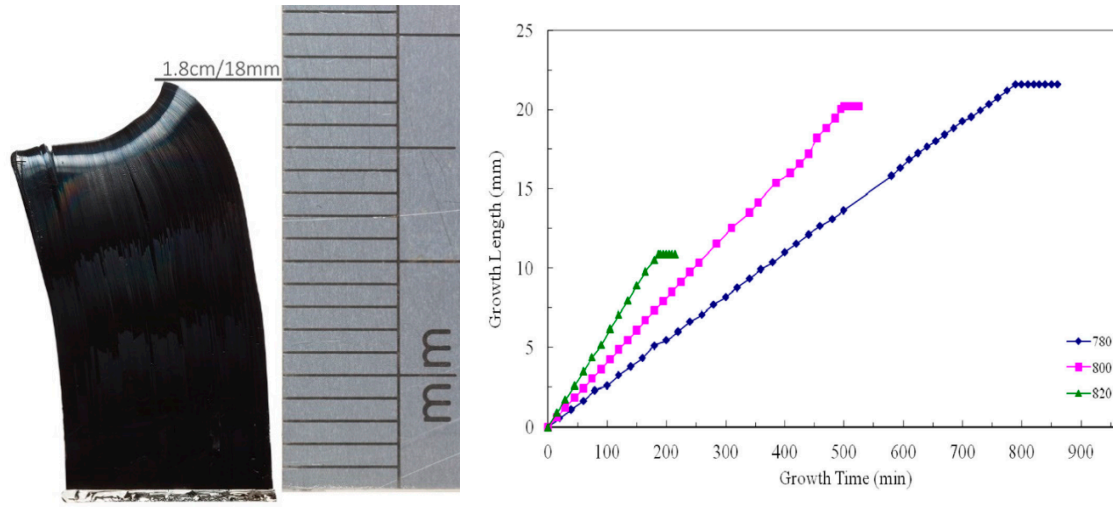

**SI Figure 2:** (left) VACNT height at 750 °C on 1 cm size Si wafer, (right) VACNT height for Process A at temperatures of 780-820 °C.

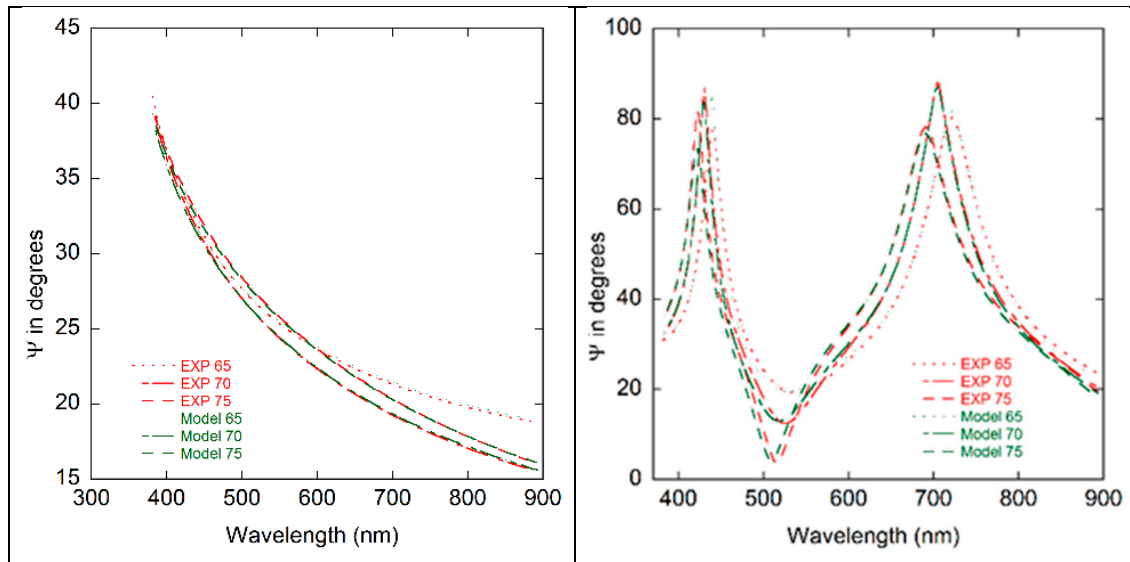

**SI Figure 3.** Ellipsometry analysis shows the thickness of iron catalyst on substrates. (Left) Process A, Process B: 2.5 nm Fe/20 nm Al<sub>2</sub>O<sub>3</sub>/400 SiO<sub>2</sub> wafer, (Right) Process C: 1.5 nm Fe/10 nm Al<sub>2</sub>O<sub>3</sub>/20 SiO<sub>2</sub> wafer.

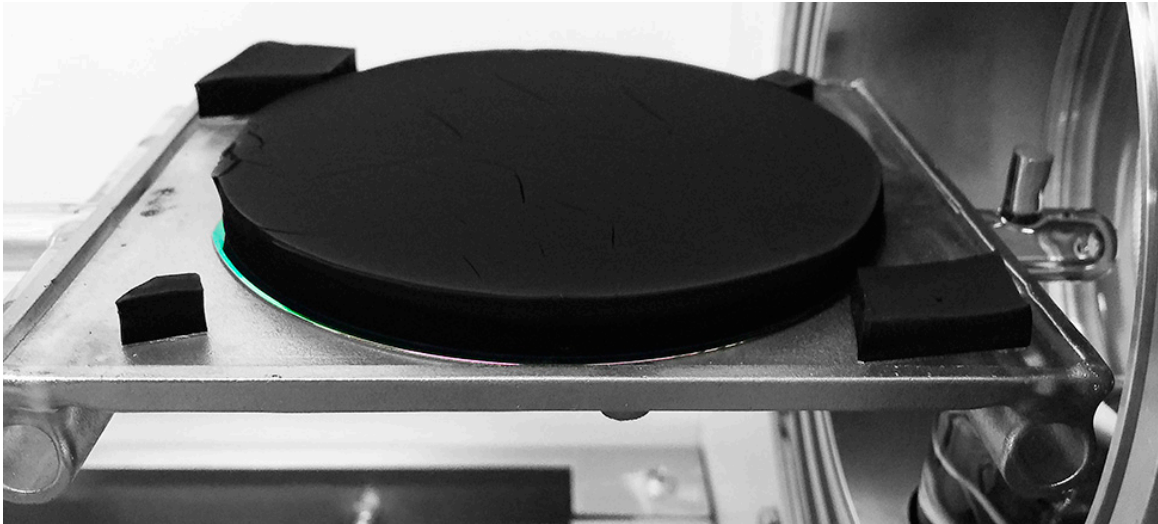

**SI Figure 4:** 10 mm thick VACNT on 4" Si wafer with a  $\sim 40\ \mu\text{m}$  thick crusted top (growth process A).

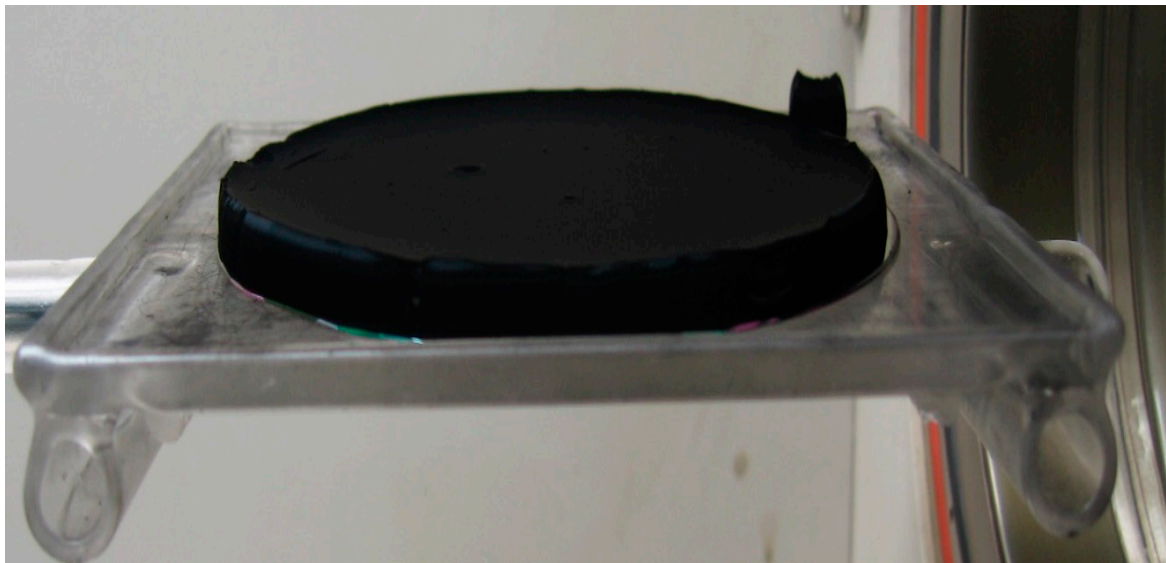

**SI Figure 5:** 4 mm thick, more fluffy VACNT growth on full 4" Si wafer with a  $\sim 20\ \mu\text{m}$  thick crusted top of (Process B).

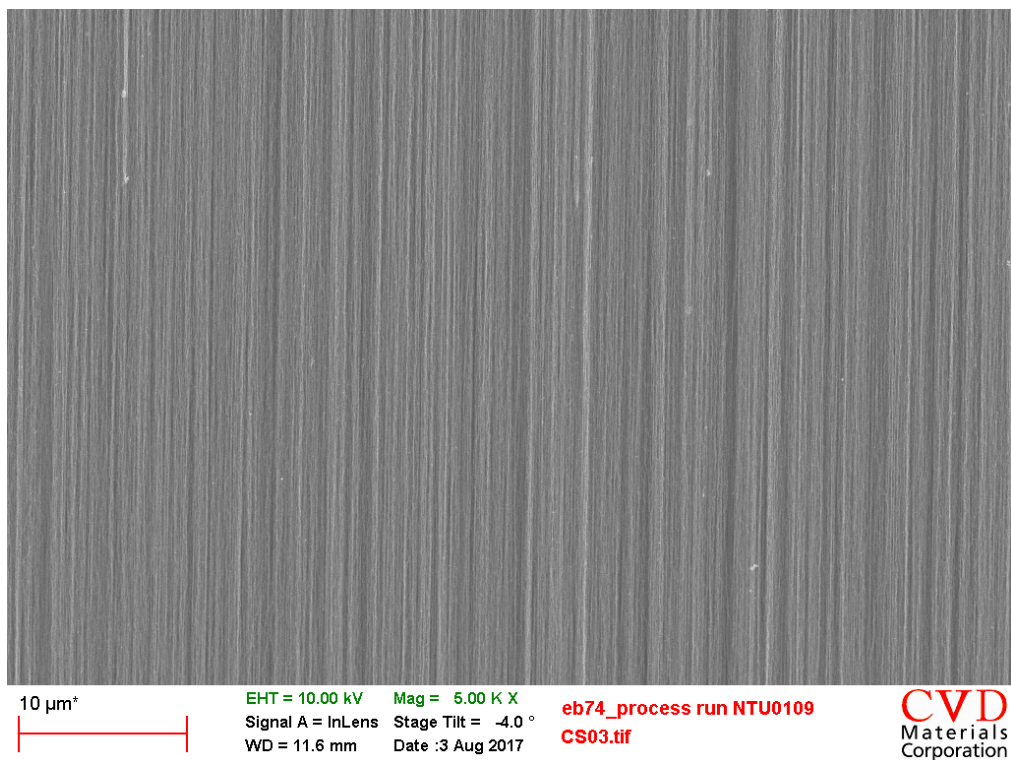

**SI Fig. 6a:** Low-resolution SEM images of VACNT sample grown with Process C.

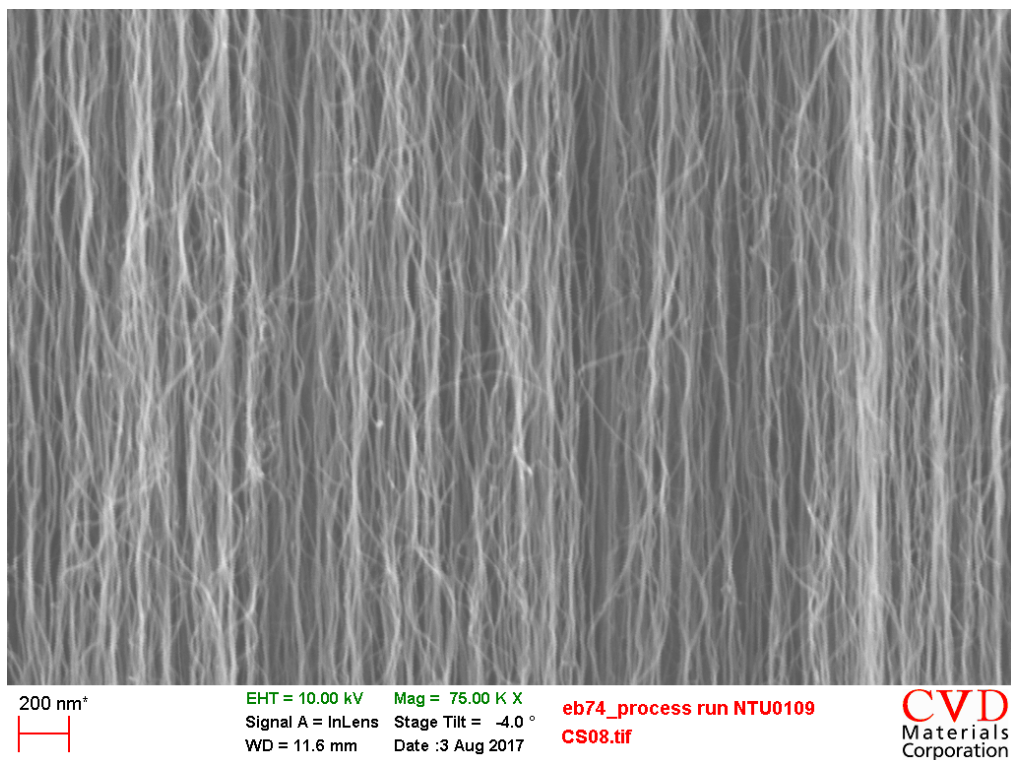

**SI Fig. 6b:** High-resolution SEM images of VACNT sample grown with Process C.

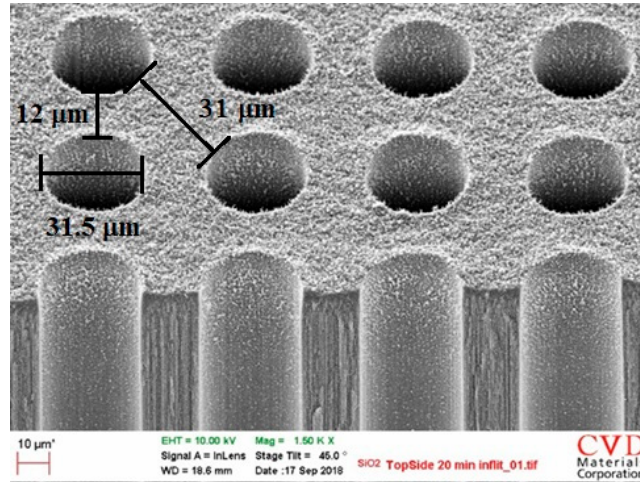

**SI Figure 7:** SEM images of VACNT (growth process C +carbon infiltration process highlighting the remaining top 5-10  $\mu\text{m}$  thick “crust” layer

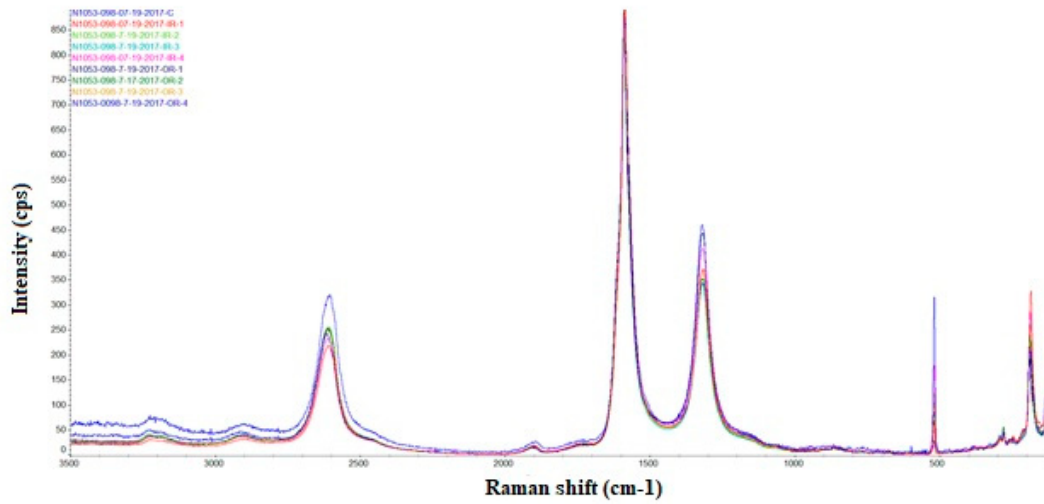

**SI Figure 8:** Raman spectra at different points (center, inner radius, and outer radius) showing the RBM of VACNTs grown on 4-inch Si wafer for Process C.
